# Supplementary material
Source: PubMed Central journal article supplement (PMC5330837)
Supplement: NIHMS839090-supplement-ds.pdf [file NIHMS839090-supplement-ds.pdf]

SUPPLEMENTAL MATERIAL

Figure I: PRIMSA diagram referenced in Feldman et al.<sup>1</sup>

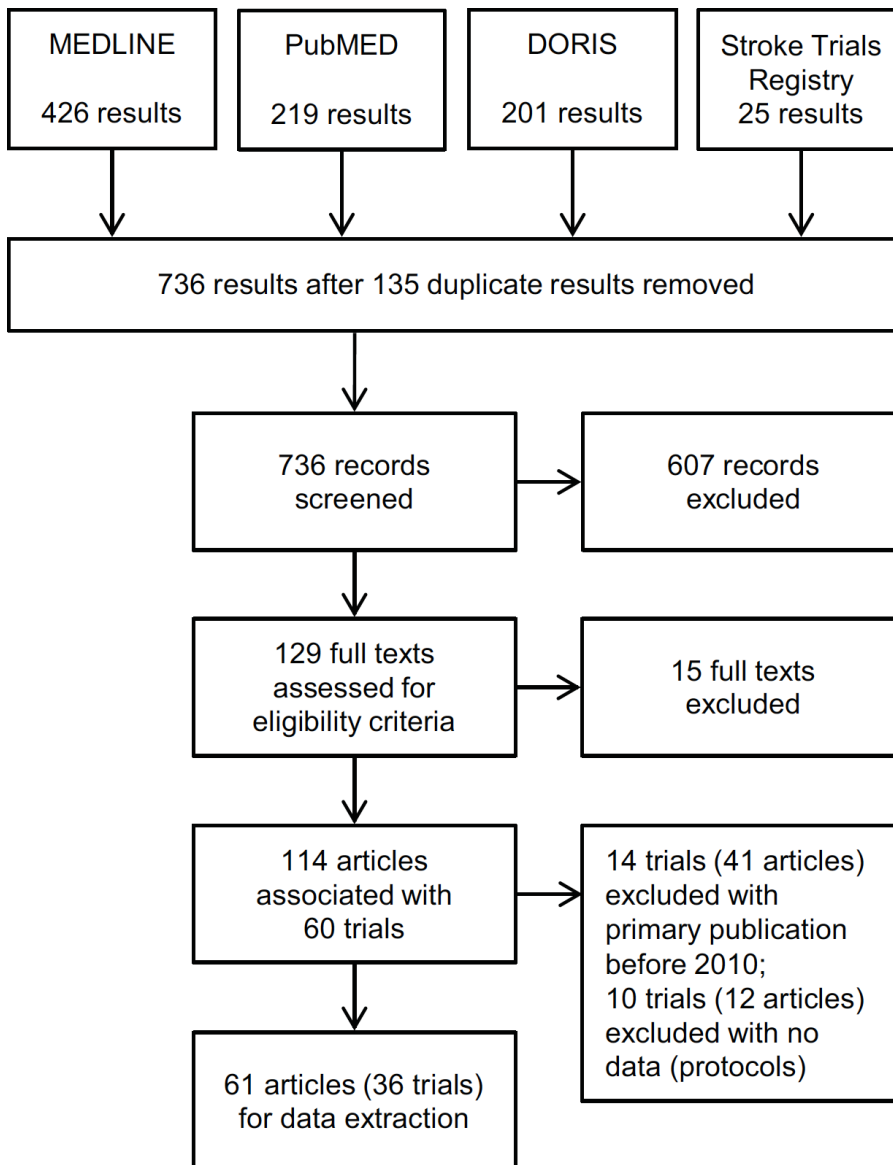

**Table I: Disaggregated data from trials in review**

| <b>Trial</b>                                             | <b>Date</b> | <b>Region</b> | <b>Intervention</b>       | <b># Participants</b> | <b># Sites</b> | <b>Trial duration (mo)</b> | <b>Maximum time to intervention (hrs)</b> | <b>t-PA given</b> | <b>Recruitment rate (indiv/mo)</b> | <b>Recruitment efficiency (indiv/site/mo)</b> |
|----------------------------------------------------------|-------------|---------------|---------------------------|-----------------------|----------------|----------------------------|-------------------------------------------|-------------------|------------------------------------|-----------------------------------------------|
| Early Stroke Trial Group <sup>2</sup>                    | 1994        | North America | Monosialoganglioside GM-1 | 792                   | 16             | 36                         | 5                                         | No                | 22.0                               | 1.4                                           |
| MAST-I Study Group <sup>3</sup>                          | 1995        | Europe        | streptokinase/aspirin     | 622                   | 70             | 46                         | 6                                         | Yes               | 13.5                               | 0.2                                           |
| NINDS rt-PA Stroke Study Group <sup>4</sup>              | 1995        | North America | alteplase                 | 624                   | 36             | 46                         | 3                                         | Yes               | 13.6                               | 0.4                                           |
| ECASS Study Group <sup>5</sup>                           | 1995        | Europe        | alteplase                 | 620                   | 75             | 16                         | 6                                         | Yes               | 38.8                               | 0.5                                           |
| RANTTAS Investigators <sup>6</sup>                       | 1996        | North America | tirilazad                 | 660                   | 27             | 20                         | 6                                         | No                | 33.0                               | 1.2                                           |
| MAST-E Study Group <sup>7</sup>                          | 1996        | Europe        | streptokinase             | 310                   | 48             | 24                         | 6                                         | Yes               | 12.9                               | 0.3                                           |
| ASK Study Group <sup>8</sup>                             | 1996        | Australia     | streptokinase             | 340                   | 40             | 31                         | 4                                         | Yes               | 11.0                               | 0.3                                           |
| PASS Group <sup>9</sup>                                  | 1997        | Europe        | piracetam                 | 927                   | 55             | 39                         | 12                                        | No                | 23.8                               | 0.4                                           |
| ECASS II Investigators <sup>10</sup>                     | 1998        | Multiple      | alteplase                 | 800                   | 100            | 16                         | 6                                         | Yes               | 50.0                               | 0.5                                           |
| ATLANTIS Study Investigators <sup>11</sup>               | 1999        | North America | alteplase                 | 613                   | 140            | 56                         | 5                                         | Yes               | 10.9                               | 0.1                                           |
| Cervene Stroke Study Investigators <sup>12</sup>         | 2000        | North America | nalmafene                 | 368                   | 45             | 21                         | 6                                         | Yes               | 17.5                               | 0.4                                           |
| GAIN International Investigators <sup>13</sup>           | 2000        | Multiple      | gavestinel                | 1804                  | 173            | 15                         | 6                                         | No                | 120.3                              | 0.7                                           |
| LUB-INT 13 Investigators <sup>14</sup>                   | 2000        | Multiple      | lubeluzole                | 1786                  | 131            | 23                         | 8                                         | No                | 77.7                               | 0.6                                           |
| STAT Participants <sup>15</sup>                          | 2000        | North America | ancrod                    | 500                   | 48             | 54                         | 3                                         | No                | 9.3                                | 0.2                                           |
| GAIN Americas Investigators <sup>16</sup>                | 2001        | North America | gavestinel                | 1646                  | 132            | 19                         | 6                                         | Yes               | 86.6                               | 0.7                                           |
| Aptiganel Acute Stroke Investigators <sup>17</sup>       | 2001        | Multiple      | aptiganel                 | 628                   | 156            | 15                         | 6                                         | No                | 41.9                               | 0.3                                           |
| Enlimomab Acute Stroke Trial Investigators <sup>18</sup> | 2001        | North America | enlimomab                 | 625                   | 67             | 21                         | 6                                         | No                | 29.8                               | 0.4                                           |
| IMAGES Study Investigators <sup>19</sup>                 | 2004        | Multiple      | magnesium                 | 2589                  | 99             | 67                         | 12                                        | Yes               | 38.6                               | 0.4                                           |
| ALIAS Investigators <sup>20</sup>                        | 2011        | North America | albumin                   | 434                   | 62             | 18                         | 5                                         | Yes               | 24.1                               | 0.4                                           |

|                                                 |      |          |              |      |     |     |     |     |      |     |
|-------------------------------------------------|------|----------|--------------|------|-----|-----|-----|-----|------|-----|
| CASTA Investigators <sup>21</sup>               | 2012 | Asia     | cerebrolysin | 1070 | 51  | 49  | 12  | Yes | 21.8 | 0.4 |
| IST-3 Collaborative Group <sup>22</sup>         | 2012 | Multiple | rt-PA        | 3035 | 156 | 135 | 6   | Yes | 22.5 | 0.1 |
| ARTIS Investigators <sup>23</sup>               | 2012 | Europe   | aspirin      | 642  | 37  | 34  | 6   | Yes | 18.9 | 0.5 |
| IMS III <sup>24</sup>                           | 2013 | Multiple | endovascular | 656  | 58  | 69  | 3.7 | Yes | 9.5  | 0.2 |
| MACSI <sup>25</sup>                             | 2013 | Multiple | DP-b99       | 446  | 154 | 26  | 9   | No  | 17.2 | 0.1 |
| SYNTHESIS Expansion Investigators <sup>26</sup> | 2013 | Europe   | endovascular | 362  | 24  | 51  | 4.5 | Yes | 7.1  | 0.3 |
| AXIS 2 Investigators <sup>27</sup>              | 2013 | Europe   | G-CSF        | 328  | 78  | 24  | 9   | Yes | 14.0 | 0.2 |
| ALIAS and NETT Investigators <sup>28</sup>      | 2013 | Multiple | albumin      | 848  | 89  | 44  | 5   | Yes | 19.3 | 0.2 |
| URICO-ICTUS Investigators <sup>29</sup>         | 2014 | Europe   | uric acid    | 421  | 10  | 22  | 4.5 | No  | 19.1 | 1.9 |

## References

1. Feldman WB, Kim AS, Josephson SA, Lowenstein DH, Chiong W. Effect of waivers of consent on recruitment in acute stroke trials: A systematic review. *Neurology*. 2016;86:1543-1551.
2. Lenzi GL, Grigoletto F, Gent M, Roberts RS, Walker MD, Easton DE, et al. Early treatment of stroke with monosialoganglioside GM-1: Efficacy and safety results of the Early Stroke Trial. *Stroke*. 1994;25:1552-1558.
3. Multicentre Acute Stroke Trial--Italy (MAST-I) Group. Randomised controlled trial of streptokinase, aspirin, and combination of both in treatment of acute ischaemic stroke. *Lancet*. 1995;346:1509-1514.
4. The National Institute of Neurological Disorders and Stroke rt-PA Stroke Study Group. Tissue plasminogen activator for acute ischemic stroke. *N Engl J Med*. 1996;334:1405-1406.
5. Hacke W, Kaste M, Fieschi C, Toni D, Lesaffre E, von Kummer R, et al. Intravenous thrombolysis with recombinant tissue plasminogen activator for acute hemispheric stroke. The European Cooperative Acute Stroke Study (ECASS). *JAMA*. 1995;274:1017-1025.
6. The RANTTAS Study Group. A randomized trial of tirilazad mesylate in patients with acute stroke (RANTTAS). *Stroke*. 1996;27:1453-1458.
7. The Multicenter Acute Stroke Trial - Europe Study Group. Thrombolytic therapy with streptokinase in acute ischemic stroke. *N Engl J Med*. 1996;335:145-150.
8. Donnan GA, Davis SM, Chambers BR, Gates PC, Hankey GJ, McNeil JJ, et al. Streptokinase for acute ischemic stroke with relationship to time of administration. *JAMA*. 1996;276:961-966.
9. De Deyn PP, De Reuck J, Deberdt W, Vlietinck R, Orgogozo J-M, for members of the Piracetam in Acute Stroke (PASS) Group. Treatment of Acute Ischemic Stroke With Piracetam. *Stroke*. 1997;28:2347-2352.
10. Hacke W, Kaste M, Fieschi C, Kummer R, Davalos A, Meier D, et al. Randomised double-blind placebo-controlled trial of thrombolytic therapy with intravenous alteplase in acute ischaemic stroke (ECASS II). *Lancet*. 1998;352:1245-1251.
11. Clark WM, Wissman S, Albers GW, Jhamandas JH, Madden KP, Hamilton S, et al. Recombinant tissue-type plasminogen activator (alteplase) for ischemic stroke 3 to 5 hours after symptom onset: The ATLANTIS Study: a randomized controlled trial. *JAMA*. 1999;282:2019-2026.
12. Clark WM, Raps EC, Tong DC, Kelly RE, for the Cervene Stroke Study Investigators. Cervene (nalmefene) in acute ischemic stroke: final results of a phase III efficacy study. *Stroke*. 2000;31:1234-1239.
13. Lees KR, Asplund K, Carolei A, Davis SM, Diener H-C, Kaste M, et al. Glycine antagonist (gavestinel) in neuroprotection (GAIN International) in patients with acute stroke: a randomised controlled trial. *Lancet*. 2000;355:1949-1954.
14. Diener HC, Cortens M, Ford G, Grotta J, Hacke W, Kaste H, et al. Lubeluzole in acute ischemic stroke treatment: A double-blind study with an 8-hour inclusion window comparing a 10-mg daily dose of lubeluzole with placebo. *Stroke*. 2000;31:2543-2551.
15. Sherman DG, Atkinson RP, Chippendale T, Levin KA, Ng K, Futrell N, et al. Intravenous ancrod for treatment of acute ischemic stroke: The STAT study: A randomized controlled trial. *JAMA*. 2000;283:2395-2403.
16. Sacco RL, DeRosa JT, Haley EC, Levin B, Ordroneau P, Phillips SJ, et al. Glycine antagonist in neuroprotection for patients with acute stroke: GAIN Americas: a randomized controlled trial. *JAMA*. 2001;285:1719-1728.
17. Albers GW, Goldstein LB, Hall D, Lesko LM, for the Aptiganel Acute Stroke Investigators. Aptiganel hydrochloride in acute ischemic stroke: a randomized controlled trial. *JAMA*. 2001;286:2673-2682.
18. Enlimomab Acute Stroke Trial Investigators. Use of anti-ICAM-1 therapy in ischemic stroke: Results of the Enlimomab Acute Stroke Trial. *Neurology*. 2001;57:1428-1434.
19. Intravenous Magnesium Efficacy in Stroke (IMAGES) Study Investigators. Magnesium for acute stroke (Intravenous Magnesium Efficacy in Stroke trial): Randomised controlled trial. *Lancet*. 2004;363:439-445.
20. Ginsberg MD, Palesch YY, Martin RH, Hill MD, Moy CS, Waldman BD, et al. The albumin in acute stroke (ALIAS) multicenter clinical trial: Safety analysis of part 1 and rationale and design of part 2. *Stroke*. 2011;42:119-127.
21. Heiss W-D, Brainin M, Bornstein NM, Tuomilehto J, Hong Z, for the Cerebrolysin in Acute Stroke Treatment (CASTA) Investigators. Cerebrolysin in patients with acute ischemic stroke in Asia: Results of a double-blind, placebo-controlled randomized trial. *Stroke*. 2012;43:630-636.
22. The IST-3 Collaborative Group. The benefits and harms of intravenous thrombolysis with recombinant tissue plasminogen activator within 6 h of acute ischaemic stroke (the third international stroke trial [IST-3]): a randomised controlled trial. *Lancet*. 2012;379:2352-2363.
23. Zinkstok SM, Roos YB, on behalf of the ARTIS investigators. Early administration of aspirin in patients treated

- with alteplase for acute ischaemic stroke: a randomised controlled trial. *Lancet*. 2012;380:731-737.
24. Broderick JP, Palesch YY, Demchuk AM, Yeatts SD, Khatri P, Hill MD, et al. Endovascular therapy after intravenous t-PA versus t-PA alone for stroke. *N Engl J Med*. 2013;368:893-903.
  25. Lees KR, Bornstein N, Diener H-C, Gorelick PB, Rosenberg G, Shuaib A, et al. Results of Membrane-Activated Chelator Stroke Intervention randomized trial of DP-b99 in acute ischemic stroke. *Stroke*. 2013;44:580-584.
  26. Ciccone A, Valvassori L, Nichelatti M, Sgoifo A, Ponzio M, Sterzi R, et al. Endovascular treatment for acute ischemic stroke. *N Engl J Med*. 2013;368:904-913.
  27. Ringelstein EB, Thijs V, Norrving B, Chamorro A, Aichner F, Grond M, et al. Granulocyte colony-stimulating factor in patients with acute ischemic stroke: results of the AX200 for Ischemic Stroke trial. *Stroke*. 2013;44:2681-2687.
  28. Ginsberg MD, Palesch YY, Hill MD, Martin RH, Moy CS, Barsan WG, et al. High-dose albumin treatment for acute ischaemic stroke (ALIAS) part 2: A randomised, double-blind, phase 3, placebo-controlled trial. *Lancet Neurol*. 2013;12:1049-1058.
  29. Chamorro A, Amaro S, Castellanos M, Segura T, Arenillas J, Martí-Fàbregas J, et al. Safety and efficacy of uric acid in patients with acute stroke (URICO-ICTUS): a randomised, double-blind phase 2b/3 trial. *Lancet Neurol*. 2014;13:453-460.
